# Supplementary material for: Fluorescence microscopy-based sensitive method to quantify dopaminergic neurodegeneration in a Drosophila model of Parkinson’s disease
Source: Frontiers journal article supplement (doi:10.3389/fnins.2023.1158858), 2023-06-26
Supplement: Data_Sheet_1.PDF [file Data_Sheet_1.PDF]

## **Supplementary 2**

### **Fluorescence Microscopy-Based Sensitive Method to Quantify Dopaminergic Neurodegeneration in a *Drosophila* Model of Parkinson's Disease**

Mohamad Ayajuddin<sup>1†</sup>, Rahul Chaurasia<sup>1†</sup>, Abhik Das<sup>1†</sup>, Priyanka Modi<sup>1†</sup>, Limamanen Phom<sup>1,2</sup>, Zevelou Koza<sup>1,3</sup>, and Sarat Chandra Yeniseti<sup>1\*</sup>

### **Bio-Rad Proprietary Stain-Free Gel Western Blotting: (whole protein normalization method)**

Data analysis was done using the ImageLab 5.2.1 version software.

Normalization with stain-free blot and expression analysis of Tyrosine hydroxylase

1. Open the images of stain-free blot and chemi blot (image for representative purpose only)

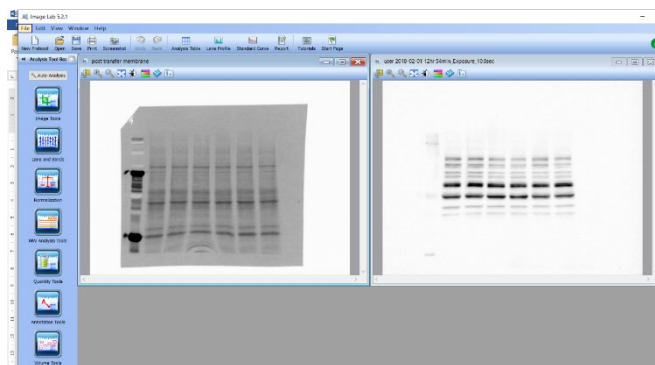

2. Select a multichannel image option

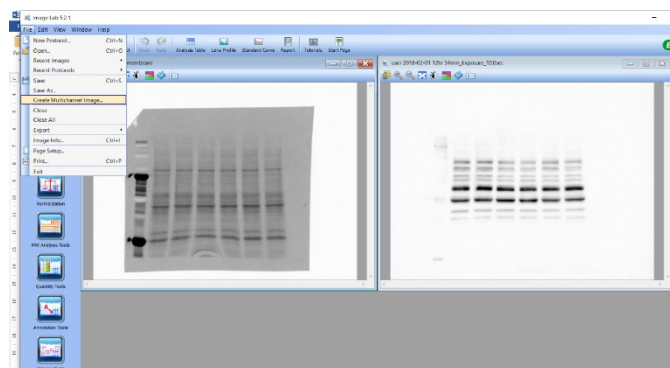

3. Quantification of brain TH expression in the present experiment:

a. Remove the RBG and on the stain-free blot select lanes by manually selecting the number of lanes

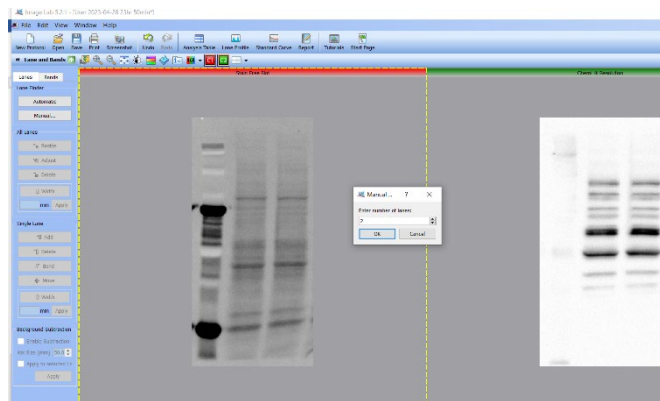

b. Adjust and resize the lanes. Copy all the lanes from the stain free and paste it onto the chemi blot. Adjust and resize the lanes on the chemi blot

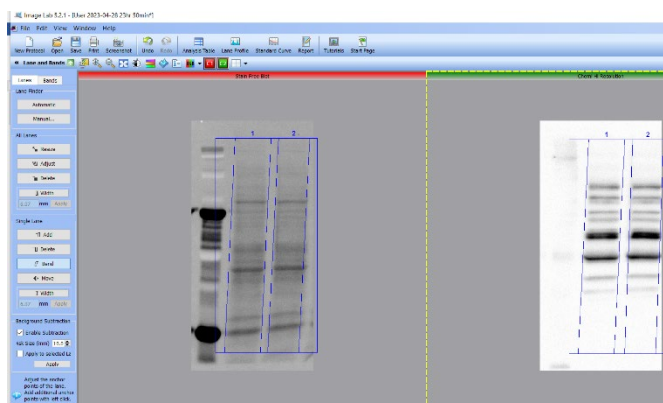

c. Select bands and click add bands on the chemi blot. Add one band per lane. Adjust the boundary and anchors of the bands on each lane so that it encompasses the whole length of the respective lanes.

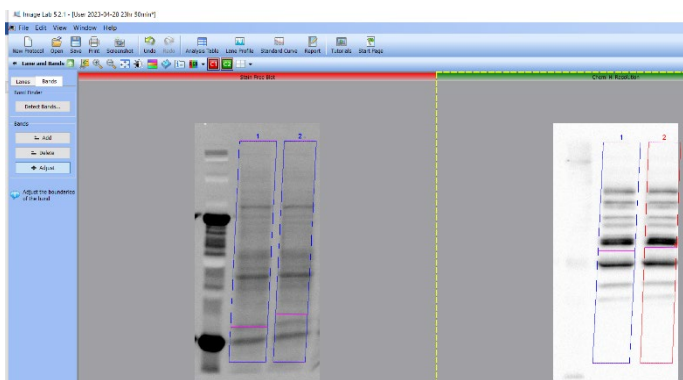

d. Select normalization on the tool panel and select stain-free blot as the normalization channel

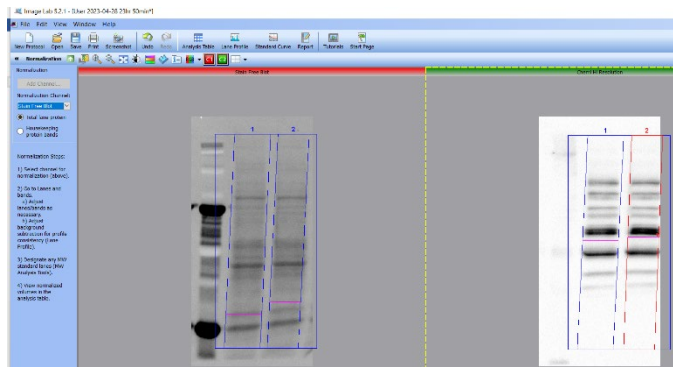

e. Click on the analysis table to get the normalization factor for each lane on the chemi blot

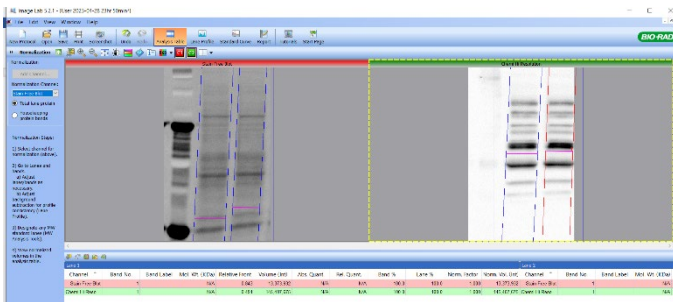

f. From the file, click export and select lane and bands table to excel

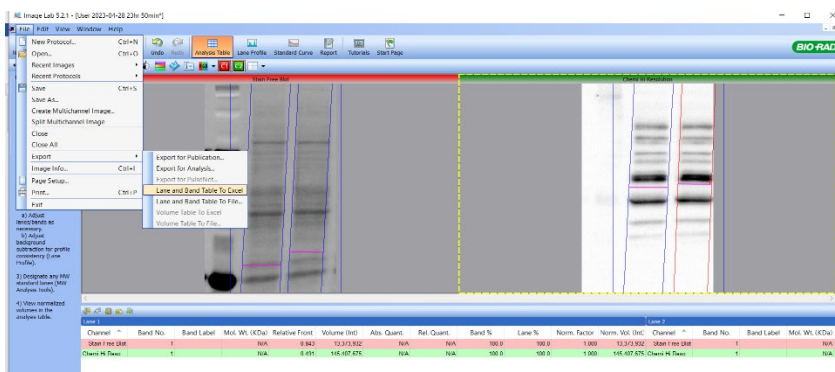

g. Excel sheet for normalization factor values for the chemi blot

Book1 - Excel

|   | A             | B                     | C          | D        | E                         | F          | G          | H      | I      | J         | K                | L |
|---|---------------|-----------------------|------------|----------|---------------------------|------------|------------|--------|--------|-----------|------------------|---|
| 1 | User          | 2023-04-28 23hr 50min |            |          |                           |            |            |        |        |           |                  |   |
| 2 | Lane 1        |                       |            |          |                           |            |            |        |        |           |                  |   |
| 3 | Channel       | Band No.              | Band Label | Mol. Wt. | (Relative Fr Volume (Int) | Abs. Quant | Rel. Quant | Band % | Lane % | Norm. Fac | Norm. Vol. (Int) |   |
| 4 | Stain Free    | 1                     | N/A        | 0.843137 | 13373932                  | N/A        | N/A        | 100    | 100    | 1         | 13373932         |   |
| 5 | Chemil Hi Res | 1                     | N/A        | 0.490998 | 145407675                 | N/A        | N/A        | 100    | 100    | 1         | 145407675        |   |
| 6 | Lane 2        |                       |            |          |                           |            |            |        |        |           |                  |   |
| 7 | Channel       | Band No.              | Band Label | Mol. Wt. | (Relative Fr Volume (Int) | Abs. Quant | Rel. Quant | Band % | Lane % | Norm. Fac | Norm. Vol. (Int) |   |
| 8 | Stain Free    | 1                     | N/A        | 0.784314 | 12262064                  | N/A        | N/A        | 100    | 100    | 0.97839   | 13373932         |   |
| 9 | Chemil Hi Res | 1                     | N/A        | 0.476268 | 141288746                 | N/A        | N/A        | 100    | 100    | 0.97839   | 154100164        |   |



### Calculation of TH protein expression in Control and PQ-treated brains

| STEPS                                                                                                                                                                               | CONTROL                               | TREATED                                         |
|-------------------------------------------------------------------------------------------------------------------------------------------------------------------------------------|---------------------------------------|-------------------------------------------------|
| Calculation of <b>Normalization Factor</b> : from the normalization tool of Bio-Rad ImageLab software.                                                                              | 1                                     | 0.97839                                         |
| Calculation of <b>adjusted intensity</b> : band intensity as obtained from the volume analysis tool of the ImageLab software                                                        | 1,28,69,388.21                        | 1,12,30,941.85                                  |
| <b>Expression</b> is calculated by dividing the adjusted intensity by the control adjusted intensity into all the groups (in the present study only two ie. Control and PQ-treated) | $1,28,69,388.21 / 1,28,69,388.21 = 1$ | $1,12,30,941.85 / 1,28,69,388.21 = 0.872686538$ |
| Calculation of <b>normalized expression</b> : multiply expression with the normalization factor                                                                                     | $1 \times 1 = 1$                      | $0.87268 \times 0.97839 = 0.85382$              |

**The result shows that upon PQ treatment depletion in brain TH protein is fifteen percent (15%) compared to control.**
